# Supplementary material for: Investigation of direct simultaneous uranium isotopic determination and age dating of micrometer-sized uranium particles by laser ablation – multi-collector ICPMS
Source: Royal Society of Chemistry journal article supplement (doi:10.1039/d4ja00280f), 2024-01-01
Supplement: d4ja00280f1.pdf [file d4ja00280f1.pdf]

**SUPPLEMENTARY MATERIAL table 1: U-050 individual isotopic data (April 2023)**

| April<br>2023 | $^{234}\text{U}/^{238}\text{U}$ |          | $^{235}\text{U}/^{238}\text{U}$ |          | $^{230}\text{Th}/^{234}\text{U}$ |          |
|---------------|---------------------------------|----------|---------------------------------|----------|----------------------------------|----------|
|               | median RSF<br>corrected         | unc.     | median RSF<br>corrected         | unc.     | median RSF<br>corrected          | unc.     |
| p1            | 2,86E-04                        | 1,22E-05 | 5,24E-02                        | 4,10E-04 |                                  |          |
| p2            | 3,10E-04                        | 1,29E-05 | 5,24E-02                        | 2,79E-04 |                                  |          |
| p3            |                                 |          | 5,23E-02                        | 1,43E-04 |                                  |          |
| p4            |                                 |          | 5,23E-02                        | 7,52E-04 |                                  |          |
| p5            |                                 |          | 5,28E-02                        | 9,43E-05 | 1,88E-04                         | 3,97E-05 |
| p6            | 3,04E-04                        | 1,17E-05 | 5,27E-02                        | 2,44E-04 |                                  |          |
| p7            | 3,20E-04                        | 1,56E-05 | 5,23E-02                        | 2,41E-04 |                                  |          |
| p8            | 3,01E-04                        | 6,46E-06 | 5,27E-02                        | 5,43E-04 | 2,26E-04                         | 2,39E-05 |
| p9            | 3,04E-04                        | 7,70E-06 | 5,26E-02                        | 2,01E-04 |                                  |          |
| p10           | 3,03E-04                        | 5,86E-06 | 5,25E-02                        | 1,18E-04 |                                  |          |
| p11           | 2,91E-04                        | 5,95E-06 | 5,25E-02                        | 2,45E-04 | 1,80E-04                         | 2,84E-05 |
| p12           | 2,99E-04                        | 9,65E-06 | 5,28E-02                        | 7,38E-05 | 1,55E-04                         | 2,99E-05 |
| p13           | 2,94E-04                        | 4,24E-06 | 5,27E-02                        | 5,86E-05 | 1,87E-04                         | 3,59E-05 |
| p14           | 2,97E-04                        | 9,08E-06 | 5,24E-02                        | 1,77E-04 | 2,12E-04                         | 2,20E-05 |
| p15           | 2,86E-04                        | 6,06E-06 | 5,24E-02                        | 1,77E-04 | 1,87E-04                         | 1,72E-05 |
| p16           | 2,99E-04                        | 7,28E-06 | 5,26E-02                        | 9,80E-05 | 2,16E-04                         | 1,50E-05 |
| p17           | 2,98E-04                        | 1,21E-05 | 5,25E-02                        | 1,24E-04 |                                  |          |
| p18           |                                 |          |                                 |          |                                  |          |
| p19           | 2,97E-04                        | 5,82E-06 | 5,26E-02                        | 1,71E-04 | 1,70E-04                         | 3,93E-05 |
| p20           |                                 |          | 5,28E-02                        | 2,48E-04 |                                  |          |
| p21           | 3,00E-04                        | 7,02E-06 | 5,25E-02                        | 3,33E-04 |                                  |          |
| p22           |                                 |          | 5,29E-02                        | 1,65E-04 |                                  |          |
| p23           | 2,97E-04                        | 7,15E-06 | 5,28E-02                        | 5,74E-05 |                                  |          |
| p24           |                                 |          | 5,23E-02                        | 5,44E-04 |                                  |          |
| p25           | 3,10E-04                        | 1,08E-05 | 5,28E-02                        | 1,17E-04 |                                  |          |
| p26           | 2,97E-04                        | 1,23E-05 | 5,27E-02                        | 8,95E-05 |                                  |          |
| p27           | 2,84E-04                        | 1,03E-05 | 5,27E-02                        | 5,64E-05 |                                  |          |
| p28           | 2,92E-04                        | 5,41E-06 | 5,28E-02                        | 5,90E-05 |                                  |          |
| p29           | 3,01E-04                        | 9,91E-06 | 5,25E-02                        | 2,20E-04 | 2,45E-04                         | 4,43E-05 |
| p30           | 2,98E-04                        | 6,43E-06 | 5,24E-02                        | 2,23E-04 | 2,10E-04                         | 3,04E-05 |
| p31           | 3,02E-04                        | 6,53E-06 | 5,27E-02                        | 7,72E-05 | 2,10E-04                         | 5,08E-05 |
| p32           | 3,00E-04                        | 5,58E-06 | 5,25E-02                        | 1,67E-04 | 2,26E-04                         | 3,23E-05 |

**SUPPLEMENTARY MATERIAL table 2: U-850 individual isotopic data (April and June 2023)**

|     | Number of<br><sup>234</sup> U ions<br>integrated | RI <sup>234</sup> U/ <sup>238</sup> U |          | RI <sup>235</sup> U/ <sup>238</sup> U |       | <sup>230</sup> Th/ <sup>234</sup> U |          |
|-----|--------------------------------------------------|---------------------------------------|----------|---------------------------------------|-------|-------------------------------------|----------|
|     |                                                  | median RSF<br>corrected               | unc.     | median RSF<br>corrected               | unc.  | median RSF<br>corrected             | unc.     |
| p1  | 105 943                                          |                                       |          |                                       |       |                                     |          |
| p2  | 135 370                                          |                                       |          |                                       |       |                                     |          |
| p3  | 664 036                                          |                                       |          |                                       |       |                                     |          |
| p4  | 243 268                                          |                                       |          |                                       |       |                                     |          |
| p5  | 83 022                                           |                                       |          |                                       |       |                                     |          |
| p6  | 2 952 059                                        |                                       |          | 6.145                                 | 0.021 | 1.87E-04                            | 3.85E-05 |
| p7  | 1 537 410                                        |                                       |          |                                       |       |                                     |          |
| p8  | 31 541                                           |                                       |          |                                       |       |                                     |          |
| p9  | -                                                |                                       |          |                                       |       |                                     |          |
| p10 | -                                                |                                       |          |                                       |       |                                     |          |
| p11 | 3 574 998                                        |                                       |          | 6.193                                 | 0.039 | 1.43E-04                            | 3.13E-05 |
| p12 | 2 384 258                                        |                                       |          | 6.249                                 | 0.053 |                                     |          |
| p13 | 1 209 911                                        |                                       |          | 6.238                                 | 0.061 |                                     |          |
| p14 | 505 507                                          |                                       |          | 6.295                                 | 0.074 |                                     |          |
| p15 | 940 885                                          |                                       |          | 6.217                                 | 0.047 |                                     |          |
| p16 | 4 352 017                                        |                                       |          | 5.908                                 | 0.085 | 1.68E-04                            | 4.37E-05 |
| p17 | 3 511 826                                        |                                       |          | 6.174                                 | 0.027 | 1.59E-04                            | 2.63E-05 |
| p18 | 1 053 138                                        |                                       |          | 6.235                                 | 0.071 |                                     |          |
| p19 | 1 605 648                                        |                                       |          | 6.135                                 | 0.048 |                                     |          |
| p20 | 5 564 858                                        |                                       |          | 6.187                                 | 0.046 | 1.87E-04                            | 3.83E-05 |
| p21 | 758 547                                          |                                       |          | 6.145                                 | 0.101 | 1.27E-04                            | 1.54E-05 |
| p22 | 2 088 027                                        |                                       |          | 6.222                                 | 0.031 | 2.05E-04                            | 3.80E-05 |
| p23 | 1 126 909                                        |                                       |          |                                       |       |                                     |          |
| p24 | 2 031 188                                        |                                       |          | 6.209                                 | 0.068 | 1.59E-04                            | 4.27E-05 |
| p25 | 1 367 541                                        |                                       |          | 6.175                                 | 0.115 |                                     |          |
| p26 | 4 185 335                                        |                                       |          |                                       |       | 1.46E-04                            | 2.64E-05 |
| p27 | 1 434 785                                        |                                       |          | 6.289                                 | 0.082 | 1.48E-04                            | 3.95E-05 |
| p28 | 463 456                                          |                                       |          |                                       |       |                                     |          |
| p29 | 1 847 238                                        |                                       |          | 6.308                                 | 0.051 | 2.06E-04                            | 4.07E-05 |
| p30 | 939 207                                          |                                       |          |                                       |       |                                     |          |
| p31 | -                                                |                                       |          |                                       |       |                                     |          |
| p32 | 4 626 990                                        | 4.60E-02                              | 4.89E-04 | 6.209                                 | 0.022 | 1.87E-04                            | 1.36E-05 |
| p33 | -                                                |                                       |          |                                       |       |                                     |          |
| p34 | 3 038 698                                        | 4.46E-02                              | 1.78E-03 | 6.098                                 | 0.042 | 1.82E-04                            | 1.94E-05 |
| p35 | 2 009 310                                        | 4.61E-02                              | 8.27E-04 | 6.172                                 | 0.032 | 1.72E-04                            | 2.18E-05 |
| p36 | 2 157 895                                        | 4.57E-02                              | 8.50E-04 | 6.226                                 | 0.030 | 1.83E-04                            | 2.16E-05 |
| p37 | 43 649                                           |                                       |          |                                       |       |                                     |          |
| p38 | -                                                |                                       |          |                                       |       |                                     |          |
| p39 | 186 823                                          |                                       |          |                                       |       |                                     |          |
| p40 | 99 333                                           |                                       |          |                                       |       |                                     |          |
| p41 | 2 379 882                                        | 4.54E-02                              | 9.89E-04 | 6.173                                 | 0.058 | 1.92E-04                            | 3.73E-05 |

|            | Number of<br><sup>234</sup> U ions<br>integrated | RI <sup>234</sup> U/ <sup>238</sup> U<br>median RSF<br>corrected | unc.     | RI <sup>235</sup> U/ <sup>238</sup> U<br>median RSF<br>corrected | unc.  | <sup>230</sup> Th/ <sup>234</sup> U<br>median RSF<br>corrected | unc.     |
|------------|--------------------------------------------------|------------------------------------------------------------------|----------|------------------------------------------------------------------|-------|----------------------------------------------------------------|----------|
| <b>p42</b> | 1 406 203                                        | 4.75E-02                                                         | 1.03E-03 | 6.302                                                            | 0.061 | 1.84E-04                                                       | 1.68E-05 |
| <b>p43</b> | 1 598 639                                        | 4.50E-02                                                         | 1.20E-03 | 6.205                                                            | 0.074 |                                                                |          |
| <b>p44</b> | 2 494 837                                        | 4.73E-02                                                         | 1.62E-03 | 6.291                                                            | 0.078 |                                                                |          |
| <b>p45</b> | 899 867                                          | 4.67E-02                                                         | 9.79E-04 | 6.214                                                            | 0.031 |                                                                |          |
| <b>p46</b> | 1 969 722                                        | 4.39E-02                                                         | 1.40E-03 | 6.082                                                            | 0.053 | 2.33E-04                                                       | 4.44E-05 |
| <b>p47</b> | 1 316 420                                        | 4.58E-02                                                         | 1.40E-03 | 6.189                                                            | 0.080 | 1.84E-04                                                       | 3.24E-05 |
| <b>p48</b> | 1 743 602                                        | 4.64E-02                                                         | 8.35E-04 | 6.213                                                            | 0.037 | 1.99E-04                                                       | 4.16E-05 |
| <b>p49</b> | 1 849 011                                        | 4.65E-02                                                         | 8.91E-04 | 6.194                                                            | 0.042 |                                                                |          |
| <b>p50</b> | 959 292                                          | 4.65E-02                                                         | 1.16E-03 | 6.155                                                            | 0.040 |                                                                |          |
| <b>p51</b> | 1 061 835                                        | 4.69E-02                                                         | 9.66E-04 | 6.143                                                            | 0.039 |                                                                |          |
| <b>p52</b> | 3 093 114                                        | 4.60E-02                                                         | 1.31E-03 | 6.203                                                            | 0.028 | 1.95E-04                                                       | 4.51E-05 |
| <b>p53</b> | 1 531 832                                        | 4.72E-02                                                         | 5.58E-04 | 6.220                                                            | 0.025 |                                                                |          |
| <b>p54</b> | 2 258 683                                        | 4.68E-02                                                         | 1.09E-03 | 6.336                                                            | 0.050 | 3.17E-04                                                       | 3.09E-05 |
| <b>p55</b> | 1 562 344                                        | 4.67E-02                                                         | 7.74E-04 | 6.219                                                            | 0.020 | 1.74E-04                                                       | 2.07E-05 |
| <b>p56</b> | 875 176                                          | 4.79E-02                                                         | 1.29E-03 | 6.209                                                            | 0.045 | 1.94E-04                                                       | 3.37E-05 |
| <b>p57</b> | 1 007 898                                        | 4.70E-02                                                         | 7.72E-04 | 6.205                                                            | 0.046 |                                                                |          |
| <b>p58</b> | 2 460 284                                        | 4.64E-02                                                         | 8.02E-04 | 6.171                                                            | 0.035 | 2.08E-04                                                       | 2.83E-05 |
| <b>p59</b> | 1 598 533                                        | 4.68E-02                                                         | 5.92E-04 | 6.210                                                            | 0.016 |                                                                |          |
| <b>p60</b> | 2 093 502                                        | 4.68E-02                                                         | 7.71E-04 | 6.187                                                            | 0.025 | 2.36E-04                                                       | 3.39E-05 |

**SUPPLEMENTARY MATERIAL table 3: U-900 individual isotopic data (April and June 2023)**

|     | Number of<br><sup>234</sup> U ions<br>integrated | RI <sup>234</sup> U/ <sup>238</sup> U |          | RI <sup>235</sup> U/ <sup>238</sup> U |          | <sup>230</sup> Th/ <sup>234</sup> U |          |
|-----|--------------------------------------------------|---------------------------------------|----------|---------------------------------------|----------|-------------------------------------|----------|
|     |                                                  | median RSF<br>corrected               | unc.     | median RSF<br>corrected               | unc.     | median RSF<br>corrected             | unc.     |
| p1  | 87 679                                           | 9.22E-02                              | 4.33E-03 |                                       |          |                                     |          |
| p2  | 160 710                                          | 8.49E-02                              | 1.94E-03 | 1.03E+01                              | 1.37E-01 | 1.88E-04                            | 1.19E-05 |
| p3  | 35 668 294                                       | 8.16E-02                              | 2.47E-03 | 1.03E+01                              | 2.00E-01 | 1.76E-04                            | 1.47E-05 |
| p4  | 30 240 699                                       | 8.13E-02                              | 2.52E-03 | 1.02E+01                              | 1.34E-01 | 1.58E-04                            | 1.25E-05 |
| p5  | 15 167 871                                       | 8.78E-02                              | 8.19E-04 | 1.04E+01                              | 3.10E-02 | 1.99E-04                            | 1.33E-05 |
| p6  | 17 307 357                                       | 8.74E-02                              | 1.80E-03 | 1.05E+01                              | 5.48E-02 | 1.56E-04                            | 1.23E-05 |
| p7  | 29 210 604                                       | 7.86E-02                              | 2.50E-03 | 1.03E+01                              | 1.44E-01 | 1.90E-04                            | 2.08E-05 |
| p8  | 28 860 579                                       | 8.40E-02                              | 3.28E-03 |                                       |          | 1.78E-04                            | 2.52E-05 |
| p9  | 12 953 906                                       | 8.76E-02                              | 3.73E-03 |                                       |          | 1.70E-04                            | 1.40E-05 |
| p10 | 14 465 358                                       |                                       |          |                                       |          | 1.80E-04                            | 2.35E-05 |
| p11 | 14 882 589                                       | 8.21E-02                              | 2.57E-03 |                                       |          | 2.03E-04                            | 2.20E-05 |
| p12 | 6 768 112                                        | 8.40E-02                              | 1.82E-03 | 1.04E+01                              | 6.93E-02 | 1.90E-04                            | 1.21E-05 |
| p13 | 41 328 120                                       |                                       |          |                                       |          |                                     |          |
| p14 | 10 249 033                                       | 8.56E-02                              | 2.62E-03 |                                       |          | 1.82E-04                            | 1.55E-05 |
| p15 | 34 143 183                                       |                                       |          |                                       |          |                                     |          |
| p16 | 14 997 137                                       |                                       |          |                                       |          | 2.81E-04                            | 4.76E-05 |
| p17 | 8 118 938                                        | 9.08E-02                              | 1.61E-03 | 1.07E+01                              | 1.42E-01 | 1.61E-04                            | 2.50E-05 |
| p18 | 1 569 835                                        |                                       |          |                                       |          | 2.07E-04                            | 3.64E-05 |
| p19 | 10 994 839                                       | 8.68E-02                              | 1.55E-03 | 1.05E+01                              | 7.25E-02 | 1.69E-04                            | 2.33E-05 |
| p20 | 16 804 524                                       | 8.23E-02                              | 1.95E-03 | 1.08E+01                              | 9.28E-02 | 1.83E-04                            | 3.48E-05 |
| p21 | 4 166 900                                        | 8.59E-02                              | 2.52E-03 | 1.03E+01                              | 1.10E-01 | 1.85E-04                            | 2.46E-05 |
| p22 | 17 675 124                                       | 8.36E-02                              | 3.33E-03 |                                       |          | 1.46E-04                            | 3.01E-05 |
| p23 | 28 304 755                                       | 8.05E-02                              | 4.02E-03 |                                       |          | 2.13E-04                            | 3.83E-05 |
| p24 | 21 826 057                                       | 8.15E-02                              | 2.06E-03 | 1.03E+01                              | 1.19E-01 | 1.97E-04                            | 2.80E-05 |
| p25 | 20 450 821                                       | 8.23E-02                              | 2.74E-03 | 1.04E+01                              | 1.25E-01 | 1.93E-04                            | 3.30E-05 |
| p26 | 10 590 930                                       |                                       |          |                                       |          |                                     |          |
| p27 | 7 845 510                                        | 8.33E-02                              | 2.04E-03 | 1.04E+01                              | 8.86E-02 | 1.74E-04                            | 2.45E-05 |
| p28 | 13 313 542                                       |                                       |          | 1.03E+01                              | 1.85E-01 | 1.92E-04                            | 3.63E-05 |
| p29 | 19 778 959                                       |                                       |          |                                       |          | 1.89E-04                            | 3.13E-05 |
| p30 | 12 245 321                                       |                                       |          |                                       |          |                                     |          |
| p31 | 248 863                                          | 8.63E-02                              | 1.72E-03 | 1.04E+01                              | 1.30E-01 | 1.75E-04                            | 2.44E-05 |
| p32 | 37 376 405                                       | 8.67E-02                              | 1.83E-03 | 1.08E+01                              | 2.00E-01 |                                     |          |
| p33 | 11 941 203                                       | 8.87E-02                              | 1.28E-03 | 1.07E+01                              | 1.17E-01 |                                     |          |
| p34 | 6 105 127                                        | 8.93E-02                              | 4.00E-04 | 1.05E+01                              | 5.97E-02 | 1.62E-04                            | 3.24E-05 |
| p35 | 57 467 384                                       | 8.78E-02                              | 8.33E-04 | 1.05E+01                              | 1.33E-01 | 2.04E-04                            | 4.77E-05 |
| p36 | 10 297 142                                       | 8.75E-02                              | 6.21E-04 | 1.07E+01                              | 6.58E-02 |                                     |          |
| p37 | 13 444 802                                       | 8.76E-02                              | 1.03E-03 | 1.03E+01                              | 1.96E-01 | 1.90E-04                            | 4.50E-05 |
| p38 | 17 718 476                                       | 8.75E-02                              | 9.12E-04 | 1.03E+01                              | 1.86E-01 | 2.10E-04                            | 4.83E-05 |
| p39 | 12 815 410                                       |                                       |          |                                       |          |                                     | 0.00E+00 |
| p40 | 19 838                                           | 8.96E-02                              | 1.36E-03 |                                       |          | 1.70E-04                            | 3.98E-05 |
| p41 | 23 888 026                                       | 8.85E-02                              | 1.20E-03 |                                       |          | 1.92E-04                            | 4.67E-05 |
| p42 | 18 691 225                                       | 8.86E-02                              | 1.43E-03 | 1.07E+01                              | 1.28E-01 |                                     |          |

|            | Number of<br><sup>234</sup> U ions<br>integrated | RI <sup>234</sup> U/ <sup>238</sup> U |          | RI <sup>235</sup> U/ <sup>238</sup> U |          | <sup>230</sup> Th/ <sup>234</sup> U |          |
|------------|--------------------------------------------------|---------------------------------------|----------|---------------------------------------|----------|-------------------------------------|----------|
|            |                                                  | median RSF<br>corrected               | unc.     | median RSF<br>corrected               | unc.     | median RSF<br>corrected             | unc.     |
| <b>p43</b> | 12 142 689                                       | 8.54E-02                              | 1.47E-03 |                                       |          | 1.64E-04                            | 3.94E-05 |
| <b>p44</b> | 17 154 238                                       | 8.84E-02                              | 1.69E-03 |                                       |          |                                     |          |
| <b>p45</b> | 24 020 169                                       |                                       |          |                                       |          |                                     |          |
| <b>p46</b> | 96 678                                           | 8.67E-02                              | 1.60E-03 | 1.08E+01                              | 2.10E-01 |                                     |          |
| <b>p47</b> | 10 618 461                                       | 8.93E-02                              | 1.96E-03 |                                       |          | 1.68E-04                            | 3.79E-05 |
| <b>p48</b> | 5 576 674                                        |                                       |          |                                       |          |                                     |          |
| <b>p49</b> | 504 712                                          | 8.58E-02                              | 1.81E-03 |                                       |          |                                     |          |
| <b>p50</b> | 8 169 051                                        | 9.04E-02                              | 3.66E-03 |                                       |          |                                     |          |
| <b>p51</b> | 2 044 492                                        | 8.64E-02                              | 2.34E-03 |                                       |          | 2.04E-04                            | 4.37E-05 |
| <b>p52</b> | 4 667 220                                        | 9.15E-02                              | 2.71E-03 |                                       |          |                                     |          |
| <b>p53</b> | 3 999 335                                        | 9.02E-02                              | 3.17E-03 |                                       |          |                                     |          |
| <b>p54</b> | 1 413 406                                        | 8.93E-02                              | 2.00E-03 |                                       |          | 2.02E-04                            | 4.27E-05 |
| <b>p55</b> | 1 622 426                                        | 8.75E-02                              | 1.73E-03 |                                       |          |                                     |          |
| <b>p56</b> | 6 761 028                                        | 9.13E-02                              | 3.18E-03 |                                       |          |                                     |          |
| <b>p57</b> | 1 134 351                                        | 8.89E-02                              | 2.78E-03 |                                       |          | 2.23E-04                            | 4.47E-05 |
| <b>p58</b> | 2 143 829                                        | 8.63E-02                              | 2.62E-03 |                                       |          |                                     |          |
| <b>p59</b> | 6 434 326                                        | 8.95E-02                              | 2.05E-03 |                                       |          | 1.51E-04                            | 2.86E-05 |
| <b>p60</b> | 11 203 285                                       |                                       |          |                                       |          |                                     |          |
| <b>p61</b> | 1 690 726                                        | 8.92E-02                              | 1.40E-03 |                                       |          | 1.58E-04                            | 3.90E-05 |
| <b>p62</b> | 11 598 187                                       | 9.04E-02                              | 8.05E-04 | 1.06E+01                              | 1.18E-01 | 1.76E-04                            | 3.40E-05 |
| <b>p63</b> | 5 974 368                                        | 8.97E-02                              | 3.46E-03 |                                       |          |                                     |          |
| <b>p64</b> | 1 794 456                                        | 9.42E-02                              | 1.69E-03 | 1.13E+01                              | 2.13E-01 |                                     |          |
| <b>p65</b> | 8 203 850                                        | 9.21E-02                              | 2.56E-03 |                                       |          |                                     |          |
| <b>p66</b> | 898 200                                          | 9.02E-02                              | 1.63E-03 |                                       |          | 1.40E-04                            | 2.90E-05 |
| <b>p67</b> | 4 647 726                                        |                                       |          |                                       |          |                                     |          |
